# Supplementary material
Source: PubMed Central journal article supplement (PMC2040914)
Supplement: pnas_0701372104_1.pdf [file pnas_0701372104_1.pdf]

|                  |               | 5'          |                 | 3'          |
|------------------|---------------|-------------|-----------------|-------------|
| <b>S1</b>        | <b>Me1V</b>   | GCUUAUUUUU  | . . .           | .GCUAUUCAUC |
|                  | <b>Pu1V</b>   | GCUUUAUUUU  | . . .           | .GCUAUUCAUC |
|                  | <b>NBV</b>    | GCUUAAUUUU  | . . .           | .GCUACUCAUC |
| <b>S2</b>        | <b>Me1V</b>   | GCUUUAAGAA  | . . .           | .UCUAAUCAUC |
|                  | <b>Pu1V</b>   | GCUUUAAGAA  | . . .           | .UCUAAUCAUC |
|                  | <b>NBV</b>    | GCUUUA AAAA | . . .           | .UUUAAUCAUC |
| <b>S3</b>        | <b>Me1V</b>   | GCUUAAUUUU  | . . .           | .GCUAUUCAUC |
|                  | <b>Pu1V</b>   | GCUUAAUUUU  | . . .           | .GCUAUUCAUC |
|                  | <b>NBV</b>    | GCUUAAUUUU  | . . .           | .GCUAUUCAUC |
| <b>S4</b>        | <b>Me1V</b>   | GCUUAUUUUG  | . . .           | .GGUAUUCAUC |
|                  | <b>Pu1V</b>   | GCUUUAUUUU  | . . .           | .GAUAUUCAUC |
|                  | <b>NBV</b>    | GCUUUAUUUU  | . . .           | .GAUAUUCAUC |
| <b>Consensus</b> | <b>GCUUwA</b> |             | <b>UAUUCAUC</b> |             |
