# Supplementary material
Source: PubMed Central journal article supplement (PMC2040914)
Supplement: pnas_0701372104_3.pdf [file pnas_0701372104_3.pdf]

|      |     |                                                               |
|------|-----|---------------------------------------------------------------|
| MelV | 1   | MARAVDFDFTTLFGNRGLPTDQRQLTSLTSSNSPWQKQYSPLSLSLTSSTISTPQQPFP   |
| PulV | 1   | MARAVDFDFTTLFGNRGLPTDQRQLTSLTSSNSPWQKQYSPLALSLSSTISTPQQPFP    |
| NBV  | 1   | MARAVDFDFTTLFGNRGLPTDQRQLTSLTSSNSPWQKQYSPLALSLSSTISTPHQFPF    |
|      |     |                                                               |
| MelV | 61  | GSAWYQESMLFSALLPPVLVNQDAWRDANYKRFCWTDAAALSGLVAAPDPPRAPPYVPVSG |
| PulV | 61  | GSAWYQESMLFSALLPPVLVNQDAWRDANYKRFCWTDALSGLVAAPDPPRAPPYVPVSG   |
| NBV  | 61  | GSTWYQESMLFSALLPPVLVNQDAWRDANYKRFCWTDAAALSGLVAAPDPPRAPPYVPVSG |
|      |     |                                                               |
| MelV | 121 | AWFDLTQYPRWANRRRELETKYPLLLRITLLNMMQNGPLIYVETWPNMLSGALVNFAMSC  |
| PulV | 121 | AWFDLTQYPRWANRRRELETKYPLLLRITLLNMMQNGPLVYVETWPNMLSGSLVNFAMSC  |
| NBV  | 121 | AWFDLTQYPRWANRRRELETKYPLLLRITLLNMMQNGPLIYVETWPNMLSGALVNFAMSC  |
|      |     |                                                               |
| MelV | 181 | YGKDFREIAMVLAQSCSNMPFAPESSYDQQMRMMVSLWILSYIGVVHQNATIAGFFFSTK  |
| PulV | 181 | YGKDFREIAMVLAQSCSNMPFAPESSYDQQMRMMVSLWILSYIGVVHQNATIAGFFFSTK  |
| NBV  | 181 | YGKDFREIAMMLAQSCSNMPFAPESSYDQQMRVMVSLWILSYIGVVHQNATIAGFFFSTK  |
|      |     |                                                               |
| MelV | 241 | TRGVRDEAWTLFYNTNGQRLNITQRHFGYFCARSADWNADSSWLAASQLSALIMSCRQFP  |
| PulV | 241 | TRGVRDEAWTLFYNTNGQRLNITQRHFGYFCARSADWNADSSWLAASQLSALIMSCRQFP  |
| NBV  | 241 | TRGVRDEAWTLFYNTNGQRLNITQRHFGYFCARSADWNADSSWLAASQLSALVMSCRQFP  |
|      |     |                                                               |
| MelV | 301 | LLANQGVVNQAQNRPGYSSPNGVVPVRELQLLACATECIRSHVQAGLIDQAKGQTLTQNAT |
| PulV | 301 | LLANQGVVNQAQNRPGYSSPNGVVPVRELQLLACATECIRSHVQAGLIDQVKGQTLTQNAT |
| NBV  | 301 | LLANQGVVNQAQNRPGYSSPNGVVPVRELQLLACATECIRSHVQAGLIDQAKGQTLTQNAT |
|      |     |                                                               |
| MelV | 361 | DVNQVLQREIDDIKAADDALYNQNPEYARRLKPFQARSWTVGQSMQSLAALTAFAT      |
| PulV | 361 | DVNQVLQREIDDIKAADDALYNQNPEYARRLKPFQARSWTVGQSMQSLAALAAFAT      |
| NBV  | 361 | DVNQILQREIDDIKAADDALYNQNPEYARRIKPFQARSWTVGQSMQSLAALTAFAT      |

**Sequence identity:** MelV:PulV = 98%; MelV:NBV = 98%; PulV:NBV = 97%
