# Supplementary material
Source: PubMed Central journal article supplement (PMC2040914)
Supplement: pnas_0701372104_4.pdf [file pnas_0701372104_4.pdf]

MelV 1 MERSMRVGVS RNAAGTGSQTILRGFALLRCVLSADSRQATRAVQSHFPGLGRMTKCLSPL  
 PulV 1 MERSMRVGVS RNAAGTGSQTILRGFALLRCVLSADSRQATRAVQSHFPGLGRMTKCLSPL  
 NBV 1 MERSMRVGVS RNAAGTGSQTILRGFALLRCVLSADSRQATRAVQSHFPGLGRMTKCLSPL

MelV 61 TALSADRTVRHVNSTVLSRDVKVLADYALTCHHPGDLPATLTPVGLEAAKLVIAKFSER  
 PulV 61 TALSADRTVRHVNSTVLSRDVKVLADYALTCHHPGDLPATLTPVGLEAARLVIAKFSER  
 NBV 61 TALSADRTVRHVSVA TVLSRDAKVLADYALTCHHPGDLPATLTPVGLEAARLVIAKFSER

MelV 121 GMDLSHVLPPDASSYSPIVMCHLIARVM SGFVPMRGNDFGLEGQIDLLAAELV PFSFMLP  
 PulV 121 GMDLSHVLPPDASSYSPIVICHLIARVM SGFVPMRGNDFGLEGQIDLLAAELV PFSFMLP  
 NBV 121 GMDLAHVLPDASSYSPIVMCHLIARVM SGFVPMRGNDFGLEGRVDLLAAELV PFSFMLP

MelV 181 FLVNDDASAI AVPTARVEDMLQDISKLNQLDAAFGVE SRSDQRMTKDVAEDSSRSLNELP  
 PulV 181 FLVNDDASAI AVPTARVEDMLQDISKLNQLDAAFGVE SRSDQRMTKDVAEDSSRSLNELP  
 NBV 181 FLVNDDASAI AVPTARVEDMLQDISKLNQLDAAFGVE SRSDQRMTKDVAEDSSRSLNELP

MelV 241 SSENRRMPWKLMLAFLTFQLKLELDALADQRSELSQAHVTSFGAKL FQQMSLFSTLDS  
 PulV 241 SSENRRMPWKLMLAFLTFQLKLELDALADQRSELSQAHVTSFGAKL FQQMSLFSTLDS  
 NBV 241 SSENRRMPWKLMLAFLTFQLKLELDALADQRSELSQAHVTSFGSKL FQQMSLFSTLDS

MelV 301 ELLSLALAIKDSGLVMNPIQILTKWQSIRTGSDTINPASFSVVVRAGN WVL MKGEDAALT  
 PulV 301 ELLSLVLAIKDSGLVMNPIQILTKWQSIRTGSDTINPASFSVVVRAGN WVL MKGEDAALT  
 NBV 301 ELLSLALAIKDSGLVMNPIQILTKWQSIRTGSDAVNPASFVVVRAGN WVL MKGEDAALT

MelV 361 VRPGRIA  
 PulV 361 VRPGRIA  
 NBV 361 VRPGRIA

**Sequence identity:** MelV:PulV = 99%; MelV:NBV = 97%; PulV:NBV = 97%
