# Supplementary material
Source: PubMed Central journal article supplement (PMC2040914)
Supplement: pnas_0701372104_5.pdf [file pnas_0701372104_5.pdf]

MelV 1 MEVRTPNFHSFVESAYSSYLTRPDTWNPSTLWETGQFVTPDVIRLGNAYCCAQCCGVLYY  
 PulV 1 MEVRTPNFHSFVESAYSSYLTRPDTWNPSTLWETGQFVTPDVIRLGNAYCCAQCCGVLYY  
 NBV 1 MEVRTPNFHSFVESAYSSYLTRPDTWNPSTLWETGQFI TPDVIRLGNAYCCAQCCGVLYY  
  
 MelV 61 GYRPINLYPFPHHRCHQLHRRETSPLLKVVVRVGRITDMVREHYAVWLQSLVDHLSDEKNI  
 PulV 61 GYRPINLYPFPHHRCHQLHRRETSPLLKVVVRVGRITDMVREHYAVWLQSLVDHLSDEKNI  
 NBV 61 GYRPINLYPFPHHRCHQLNRREN SPLLKVVVRVGRITDMVREHYAVWLQSLVDHLSDEKNI  
  
 MelV 121 QDKEPMSSRVASEVLRNDVAISGDFWRGTLDLSPHDSARSIHDSMDKLSEVAGTHGLLPD  
 PulV 121 QDKEPMSSRVASEVLRNDVAISGDFWRGTLDLSPHDSAQSIHDSMDKLSEVAGTHGLLPD  
 NBV 121 QEKEPMSSRVASEVLRNDVAISGDFWRGTLDLSPHDSAQSIHDSL DKLSEVVD THGLLPD  
  
 MelV 181 CLLNVATHDHTALKMTAPVLNIYDQLDNARRSVLSATVTQMPKETADAHKLG HVTKEVA  
 PulV 181 CLLNVATHDHSALKMTAPVLNIYDQVDNARRLIFSDITVTQMLKETADAHKLQRHV NKEVA  
 NBV 181 CLIN VATHDHTALRMTAPALNIYDQLDNARRSVLSAAVTQMPKETADAHKLQR HVTKEVA  
  
 MelV 241 AAALLKPEHVIVTPIMAGLPVLARSHQPSLRVGMP LVESTQKASLYRSLPHQLAHGYHSD  
 PulV 241 GVALLKPEHVIVTPIMAGLPVLD RSHQPSMRVGMP IVESTQKASLYRSLPHQLVNGYHFD  
 NBV 241 AAALLKPEHVIITPIMAGLPVLARSHQSSLRVGMP LVESTAQKASLYRSLPHQLAHGYHSD  
  
 MelV 301 TFRITMFGLSANEAE SRLIGHHRTMLCTLPAIETSPTAVARATTSPLSIVSSDKVTMHECS  
 PulV 301 TFRITMFGLSANEAKSRMIGHHRTMLCTLPAIETSPTAVARATTSPLSIVSSDKVTMHECS  
 NBV 301 TFRITMFGLSATEAESRLMIGHHRTMLCTLPAIEPFS TAVARNIVSPLSIVP SDKVTMHECS  
  
 MelV 361 G  
 PulV 361 G  
 NBV 361 G

**Sequence identity:** MelV:PulV = 93%; MelV:NBV = 93%; PulV:NBV = 88%
